# Supplementary material
Source: Springer Nature journal article supplement (https://www.springermedizin.de/resource/supplementary/12931_2011_1076_MOESM3_ESM.pdf/9425574)

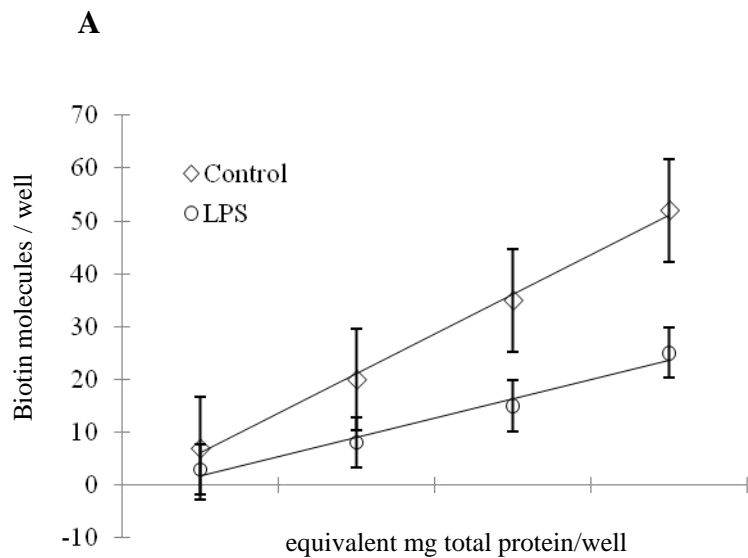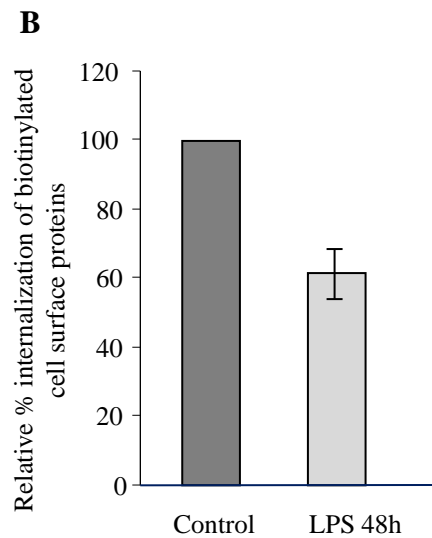

Supplement: MOESM3 [file 9425574]
